# Supplementary material for: Moyamoya disease factor RNF213 is a giant E3 ligase with a dynein-like core and a distinct ubiquitin-transfer mechanism
Source: PubMed Central journal article supplement (PMC7311170; doi:10.7554/elife.56185), 2020-06-23

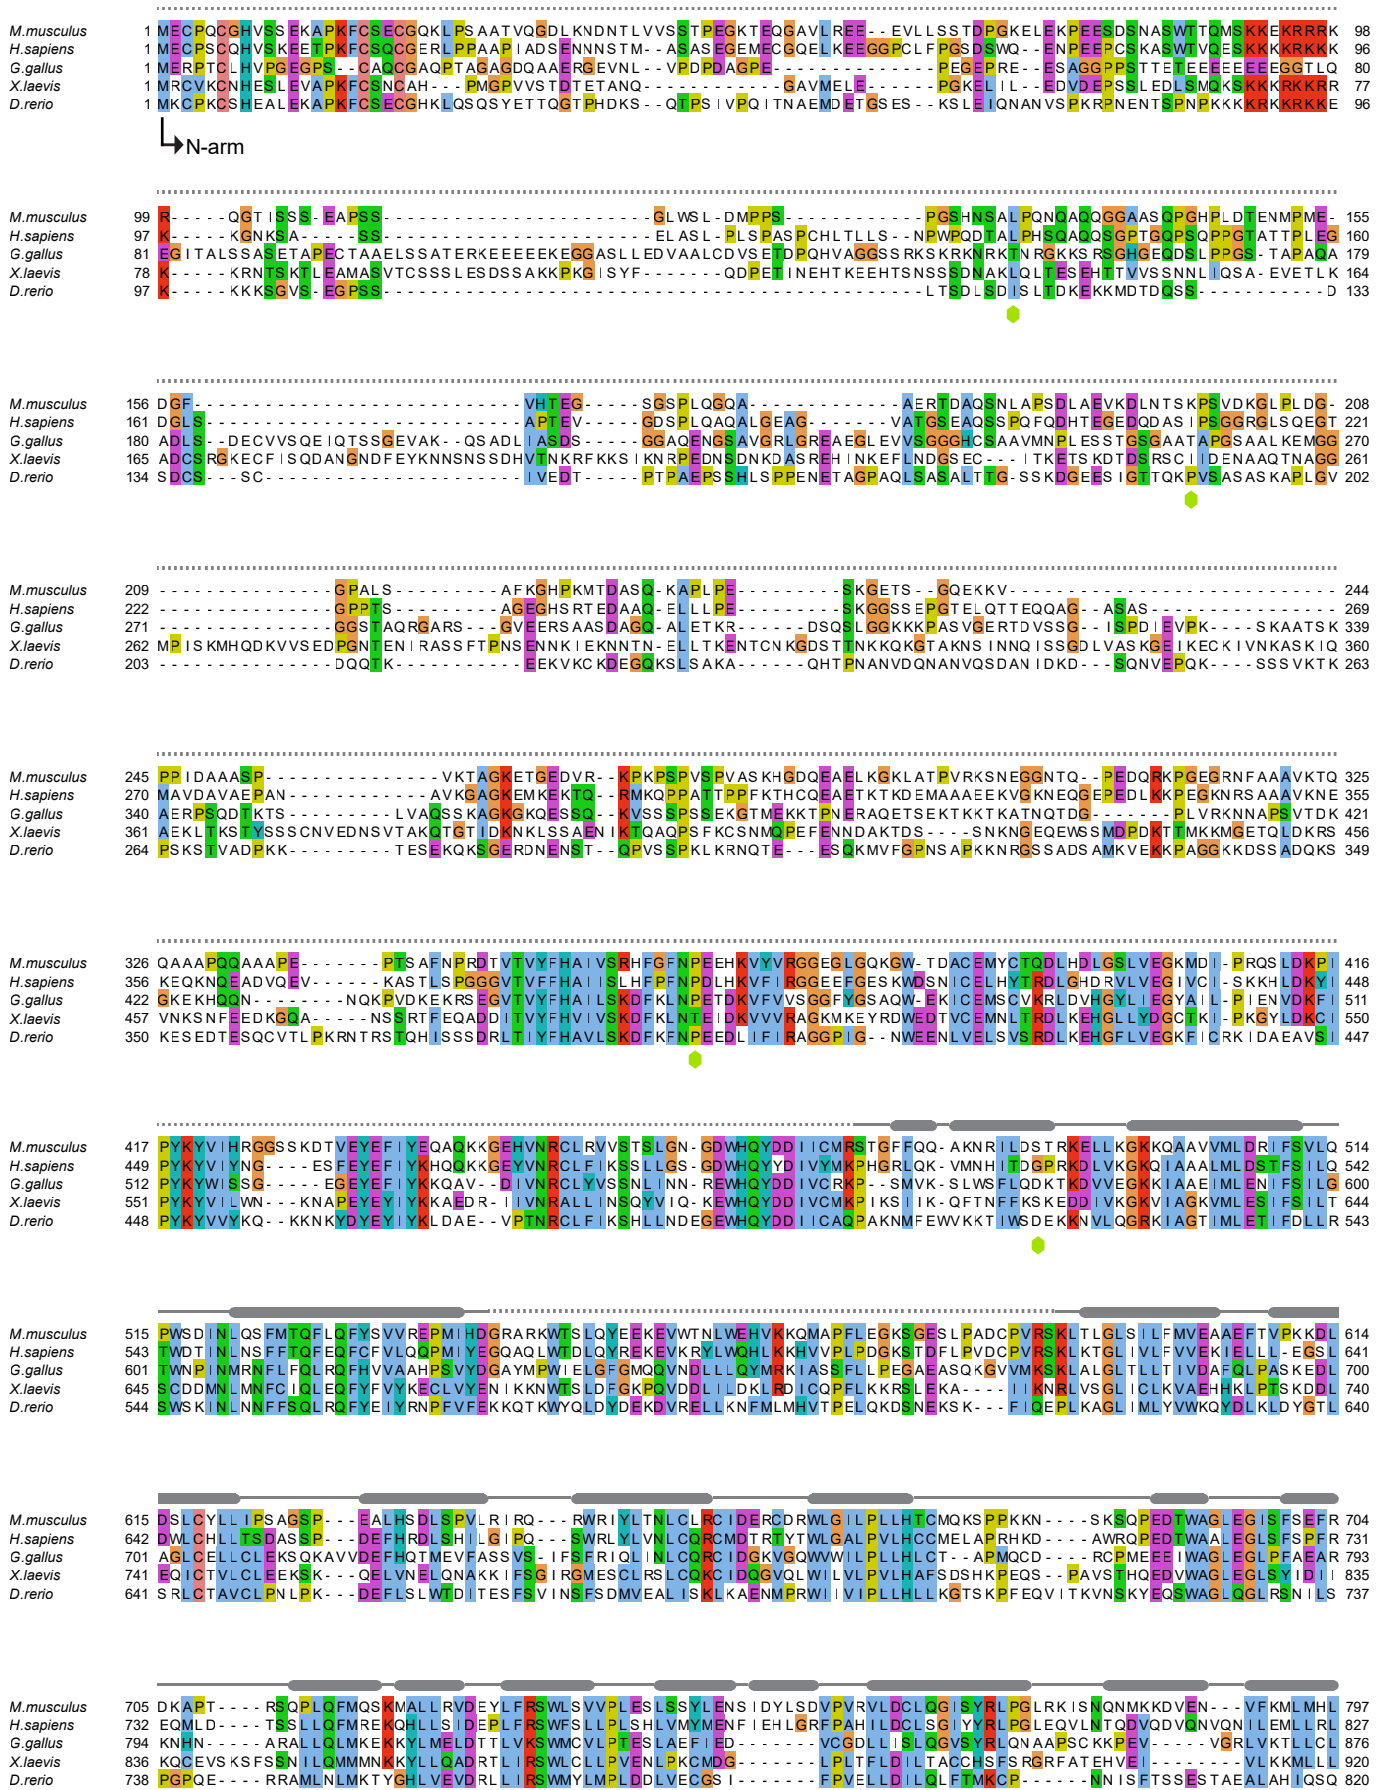

*M.musculus* 798 VD I YQH R I FGENLLQ I YL T ECL T L H E T V C N I T A N I - - - - - Q F F E I P A L S A E L I C K L L E L - - - - - S P P G H T D E G L P E K S Y E D L V T S T L Q E A L A T T R N W L R S L F 889  
*H.sapiens* 828 L D T Y R D K I P E E A L S P S Y L T V C L K L H E A I C S S T K L L - - - - - K F Y E L P A L S A E I V C R M I R L L S L V D S A G Q R D E - - - - - I G N N S V Q T V F G T L A A T K R W L R E V F 918  
*G.gallus* 877 L D G E R A R A L Q A R S W L S C L F L C F K L H A S V C T C T K R W - - - - - L E F K V P A T S A M L I A K L A R L Q P T E Q V L G - - - - - D E T A L E N E V V E I L S A L R C T R S W F K S A L 966  
*X.laueis* 921 M D D L K D K S L D G G T F K S L C S V S L K L F O N I C K S V M Y N - - - - - Y E P Q L L C A E I I L K L A S L Q - - - - - E K C G - - - - - C P E D P H Q - - - - - F D I L G K A L H L I N P W L K R T C 1003  
*D.riero* 821 L L O H R Y S C P D V D Y G I Q C I Q A A C K L L E K I C S L V R Y F G H S Q N F T D I P V A C M N L V A S V S G F - - - - - A Q I K Q E A D - - - - - T F A E K T L V L L N D T K Q V T R A M W R Q T F 911

*M.musculus* 890 K S R M L S I - - - - - S A Y V R L T Y S E M A V W R R L V E I G F F E K - - - - - H G W K S L L G D M E G R L K E P P R L Q I S F F C S S C R D G G L H D S V S R F E K V I E A V S S A C Q S G 983  
*H.sapiens* 919 T K N M L T E - - - - - S G A - - - - - S F T Y V K E I E V W R R L V E I Q F P A E - - - - - H G W K S L L G D M E W R L T K E E P L S Q I T A Y C N S C W D T K G L E D S V A K I F E K C I I E A V S S A C Q S G 1010  
*G.gallus* 967 S Q K L L K E - - - - - H H H V M F T F N A L E A W N E F V K I S F D E Q F N A R W S L L A D L E R R I Q E E D P V N Q I L A Y C C Q H R L R D L D R S I G C C F E T C A I E A V T A A C Q T C 1063  
*X.laueis* 1004 G D K I Q Y S - - - - - Y S L H K E L E I F D R L I K A G - - - - - E N V D Q K W D K L F Y L R E R I K N E P V D Q I K M F C R E Q P E L Q K H M S L G K C F E D D A I E A V R L A C Q R E 1091  
*D.riero* 912 K G R L L N H L F S H L T G T S F S T E T E V W N N I A I D F V C K D F I K E W R D F T T D F E G Y K Q Q E D H L D Q I E A Y C S N I E K L K V S Q P Y L V N S V E K A L Q A V S T I C Q T K 1011

*M.musculus* 984 T S - - - - - V L E G L S C Q D L Q - K F G T L L S A V I T K S W F V H N G E P V - F D V D E I F K Y L L K W P D V R Q L F E L C G T N E K I I D N I T E E G R Q L M A T A E S V F Q K V A G E L N G T I V 1079  
*H.sapiens* 1011 T S - - - - - I L Q G F S Y S D L R - K F G I V L S A V I T K S W P - - - - - R T A - D N F N D I L K H L L T L A D V K H V F R L C G T D E K I L A N V T E D A K R L I A V A D S V L T K V V G D L L S G T I L 1102  
*G.gallus* 1064 S S - - - - - L L D M I S Y N M D - Q F S R L I S T I I V K S W P R K V E R S Q - D D F D E I L H L L T W P D V K H I F T F N G T N T K L O E Q L T N E A R I V M A K A D S V F M S V T N E L Q E G S I L 1159  
*X.laueis* 1092 E N - - - - - I L G Q L I Q Y H L E - N F S R L V S A V I K N A W P N D D S G N P I K D Y D E I L Q H V L Q W T D G K H I L K Y G T E N V K I S N L E D E A V Q E L I L L S E S V F N D S V N L M S G K V L 1188  
*D.riero* 1012 S E W K L F A R E N K F R I N W R F G N L V S T I I L K S W K D D K G T Y F E E E A V L K H L L G W A A K N I F L H G A D E K L I D Q L S D E A K E K F A M A T S L F T N V L N Q L V L G K I K 1111

*M.musculus* 1080 V G Q L E L I L E H D S Q F L D I W N L N R R R L P S Q E K A C - - - - - D V R S L L K R R P D D L L F L K Q F R Y V E S L L R Q L G R V K H L V O V D F G N I E I I H S Q D L S N K K L N - - - - - E A V - I 1173  
*H.sapiens* 1103 V G Q L E L I I K H K N C F L D I W Q L R E K S L S P O D E Q C - - - - - A V E A L D W R R E L L L L K K E K R C V D S L L K M C G N V K H L I Q V D F G V L A V R H S Q D L S K R L N - - - - - D T V I V 1197  
*G.gallus* 1160 I K H L E E I F Q H E N C F V F I W E L K H K Q L L D G O K E L L R Q L K E V L Q R R E E L T H I M A E K K A I G T F L N M C R K V Q A S V T V Y V G E V F R Q L S E D L R S E K L N - - - - - R V V S V 1256  
*X.laueis* 1189 H K H L C C I L Q N D S Q F L E I C K M K - - - - - T E K S I N T S V K K V L G W R Q E E L S L E R E K M L V S L L K M C N V N Q C V V N V S E I K E R Q S E N L G L Q P M N - - - - - K L L T V 1279  
*D.riero* 1112 M K L L N H I L E K K S V F L E L L T D C F S E E E G Y K D I - D A M K A L I Q T R Q E V E K A I Y H E R A L A G A L I A M C H N V E E H V K V D Y K Y L E D L Y S N D M N E M D L D L F M D V H E L 1210

*M.musculus* 1174 K L N S S S Y K R - E T H Y C L S P D I R E M A S K L D S K D S H I F Q D F W O E T A E S I N T L D K D P R E L K - - - - - V S L P E V L E Y L Y N P C Y D N F Y T L Y E N L K S G 1259  
*H.sapiens* 1198 R L S T S S N S Q R - A T H Y H L S S Q V Q E M A G K I D L L R D S H I F Q L F W R E A A E P L S E P K E D Q E A A E L L S E P E E S E R H I L E L E E V Y Y L Y Q P S R K F I K L H Q D L K S G 1296  
*G.gallus* 1257 G R R P I - - - - - Q T Y Y K L S O L K E C A Q K M H A F K D S L I F Q F W E A A M K A R E K - - - - - Y G S S D E E V V P G V D L N V F E G L I A P C F M N Y E R L Y D D L R S G 1341  
*X.laueis* 1280 K T I E S P Q P P A C K S F Y N L S T N I M N M A N Y L H T Y K E S S I F M T C W K R Q A N S L S E M N G - - - - - S D E Y D E N Y E L T I E D L E E E L F A P C I D E Y R R I Y E D L K S G 1371  
*D.riero* 1211 N Q I P T E A S L E - V P Y F E L Q D D V R S M A E I L N I F K D S Y I F K L R W G N E A A L F V E R A E D E - - - - - E L D E L D E L P I I L D V L N E E I F L P C H A A Y R N I Y T S L K D S 1301

*M.musculus* 1260 K I T F A E V D A I F K D F V D K Y D E L K N D L K F M C T M N P O D Q K W I S E R V G Q I K E Y H T L Q A V S A K V I L Q V R R A L G V T G D F S V L N P L L N F A D S F E D F G N E K L D Q I 1359  
*H.sapiens* 1297 E V T L A E I D V I F K D F V N K Y T D L D S E L K I M C T V D H Q D Q R D W I K D R V E Q I K E Y H L L Q A V H A A K V I L Q V K E S L G L N G D F S V L N T L L N F T D N F D F R R E T L D Q I 1396  
*G.gallus* 1342 S L T L S A V D R I F O D F T N H P E D I K A E L N I I C E L R P A E G R R W D R R F Q O I Q Y H E M H L T D A V K I I A N V K E S L N L S G D F S V L N L L Y M T E K L E S H K T K L D F I 1441  
*X.laueis* 1372 R V T F E V D G F L K D Y N N H Y Q K L K D E L K I M C N L H I G D Q G W I D T R V K I Q Q Y H Q L H V A F K S A R V I S N V K C L E L S G D F E T L D T L L O F A D N F E E S R K O P L S C I 1471  
*D.riero* 1302 S I D F E D I D E I F R A Y K G K Y E K L A A E V A I M S K Q D F N D Q H W V Q T R I Q O I K O Y H E L H L A V E S A K V V M M V K E I L C L O G D F Q V L E K L I T T H - - - - - S D F K S E R L D S I 1399

N-arm ← | → Linker

*M.musculus* 1360 S P Q F I K A K Q L L Q D I S E P R Q R C L E E L A R Q T E L V A W L H K A L E D I N E L K V F V D L A S I S A G E N D I D V D R V A C F H D A V Q G Y A S L L Y K M D E R T N F S D F M N L Q E L W 1459  
*H.sapiens* 1397 N Q E L I Q A K K L L Q D I S E A R C K G L G A L S L R K E F I C W R E A L G G I N E L K V F V D L A S I S A G E N D I D V D R V A C F H D A V Q G Y A S L L F K L D R S V D F S A F M K H K K L W 1496  
*G.gallus* 1442 S S E L I H A K E L L Q G I T V N R Q G C L R E L A Q Q E F V C W R E A L D I N E L K V F V D L A S I S A G E N D M D V D R V A C F H D T V H G Y S L L Y E L S Q E S G F N D F M L C L R K L W 1541  
*X.laueis* 1472 N E E V M K K E V L S T I E E R C I C L K L E L R D K F Y H W K E E L T D I N E L K V F V E L A S I S A G E N D M D V D R V A C F H D A V L G Y S L L Y P N F G F H Q L M K C Q K L W 1571  
*D.riero* 1400 D N E L I Q A K N V L V D I T E P R R L C L G E L G H R K N F V I W W K E A L E D I N E L K V F V D L A S I S A G E N D L D V D R V A C F H D A V L G Y S S M L Y D L K P D A G F S L F N E M L K K L W 1499

*M.musculus* 1460 R A L D N D Q H L P D K L K D S A R N L E W L K T V K E S H G S V E L S S L S L A T A I N S R G V Y V I E A P K D G Q K I S P D T V L R L L P D G H G Y P E A L R T Y S T E E L K E L N K L M L M S 1559  
*H.sapiens* 1497 K A L D K D Q Y L P R K L C D S A R N L E W L K T V N E S H G S V E R S S L S L A T A I N Q R G I Y V I Q A P K G G Q K I S P D T V L H I L P E S P G S H E E S R E Y S L E E V K E L N K L M L M S 1596  
*G.gallus* 1542 R A L D E T E N L P K K L R A S A O H L E W L K T V K E S H G S V E L S S L S L A A T I N S R G V Y I K A P A D G R K V S L D N V L H L T L L E S S E N H R P S W K Y S L A E L R E L Q S K L M S K 1641  
*X.laueis* 1572 K A L D A D Q N L P R K L R D S A R H M D W L K T V K E S H G S V E L S S L S L A T T I N K G I Y V I K A P S E N K L V T P D T V V H L E L P E G D D E R N E V H C Y S L E E L K E L N K L M L M S 1671  
*D.riero* 1500 K A L D N D S N L P K K L C D S A R H I E W L K T V K D S H G S V E L S S L S L A S A I N S K G I Y V I N A - Q N Q K L A L E N L L K L H I M E E H D G G C E T R V Y S L E D L R L Q N K L M L M S 1598

*M.musculus* 1560 G K K D H N S N T E V E K F S E V F S N M O R L V H V F I K L H C A G N M L F R T W T A K V Y C C P D G G - I F M N F G L - E L L S Q L T E K G D V I Q L L G A L C R O M E D F L D N W K T V V A Q K 1656  
*H.sapiens* 1597 G K K D R N - N T E V E R F S E V F C S V Q R L S Q A F I D L H S A G N M L F R T W I A M A Y C S P K G V S L Q M D F G L - D L V T E L K E G G D V T E L L A A L C R O M E H F L D S W K R F V T Q K 1694  
*G.gallus* 1642 A K G E Q G - - - - - L E V E K F S E T F S N V R L A Q A F I D L Y S A G N M L F R S W L A H V H C S P K S E L C V L I D F T L - R L I P E L E G G E L A D V L P R C K T M E S F L E S W Q S F M S K K 1738  
*X.laueis* 1672 G K A D Q G - S D E V E K F B E I F S N V R L V T S F I D L Y L A G N I L F R K W E A S I Y C D N E K Y S L K M K F N V - E T L G E F E G G N L A D L L P D I C K M M E N L L D O W M D Y I N K K 1769  
*D.riero* 1599 G K G E Q G - Q C E V D Q F A E V F A S V O R L V S A F I D L Y V A G N P L F R H W E A N I N C N S K E A - C I I I D F N L G S V V S V V M V E G D V T E Q L P E V C K M E S C L R F W Q D F M D K 1696

*M.musculus* 1657 R A E H F Y L N F Y T A E O L V Y L S E L R K P R P S E - - - - - A A L M M L S F I K G K C T V Q D L V Q A T S A C E S K A D R Y C L R E - - - - - V M K K L P 1727  
*H.sapiens* 1695 R M E H F Y L N F Y T A E O L V Y L S T E L R K Q P P S D - - - - - A A L T M L S F I K S N C I L R D V L R A S V G C G S E A A R Y R M R R - - - - - V M E L P 1765  
*G.gallus* 1739 R F D H F Y L N F Y T A E O L V Y L C T E L G Q G Q P S G - - - - - K A L M M L S F L K S N C I A E D V L R A S E G H E P S S T K - - - - - A V S D L L 1805  
*X.laueis* 1770 R T D F Y L N Y Y T A E O L L Y L S Q N Q Q A S G I S E - - - - - E A L M M L S F I R P E C T K A D F I T A F Y S L K F N S S H S L S Q E K - - - - - I M F E F K 1841  
*D.riero* 1697 R S D H Y L N Y Y T A E O L V Y L C H L A H N N M E I D D Q V L M M L S F I K P S C T S D L R K A W H I L G Y D L I R K G P D N D D L D F Q T F V E V S S M T E N E S T E K S C P T S D L 1796

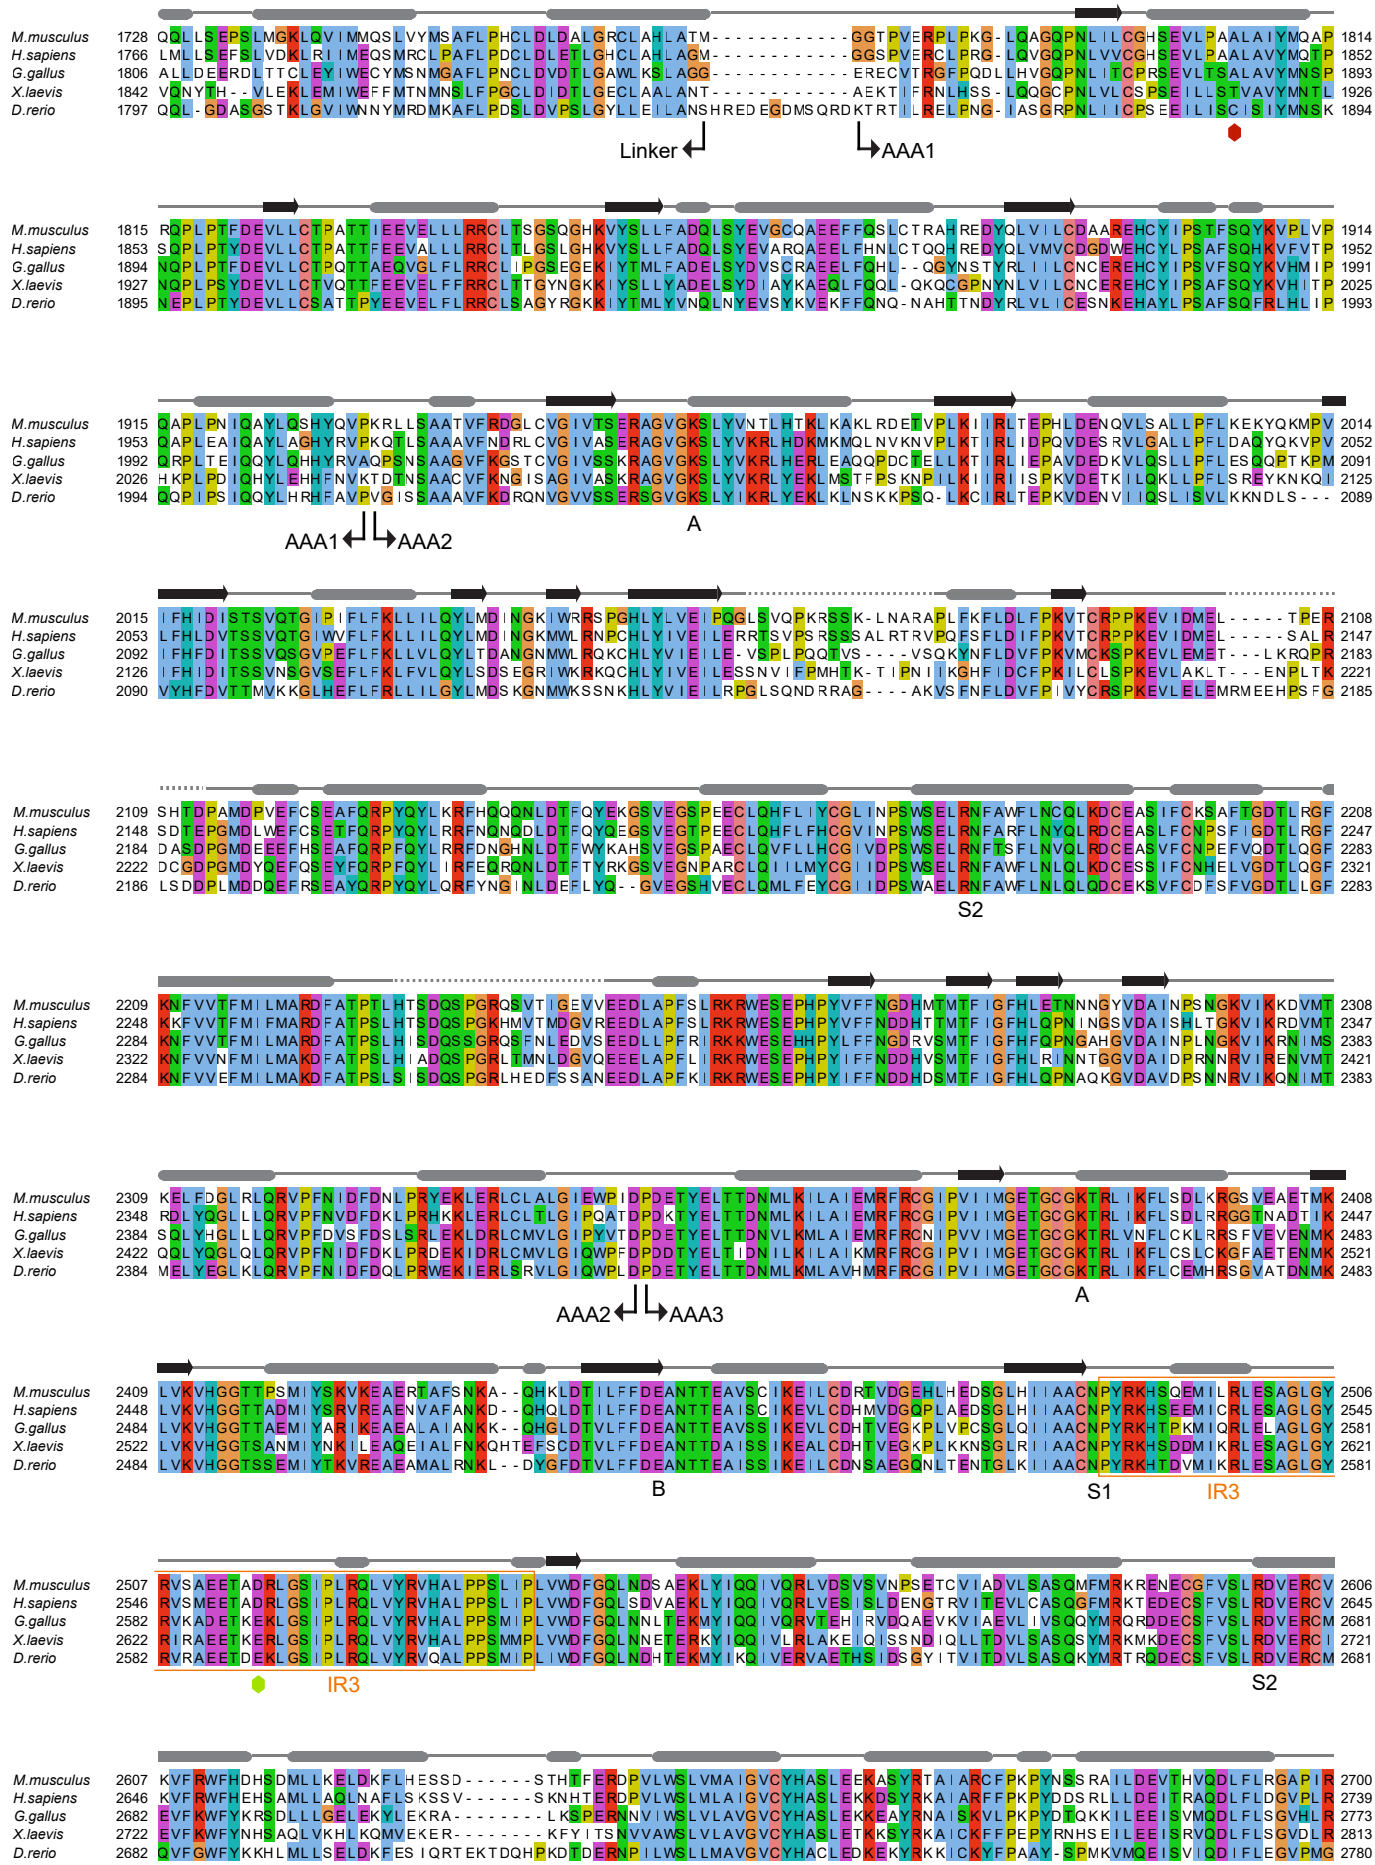

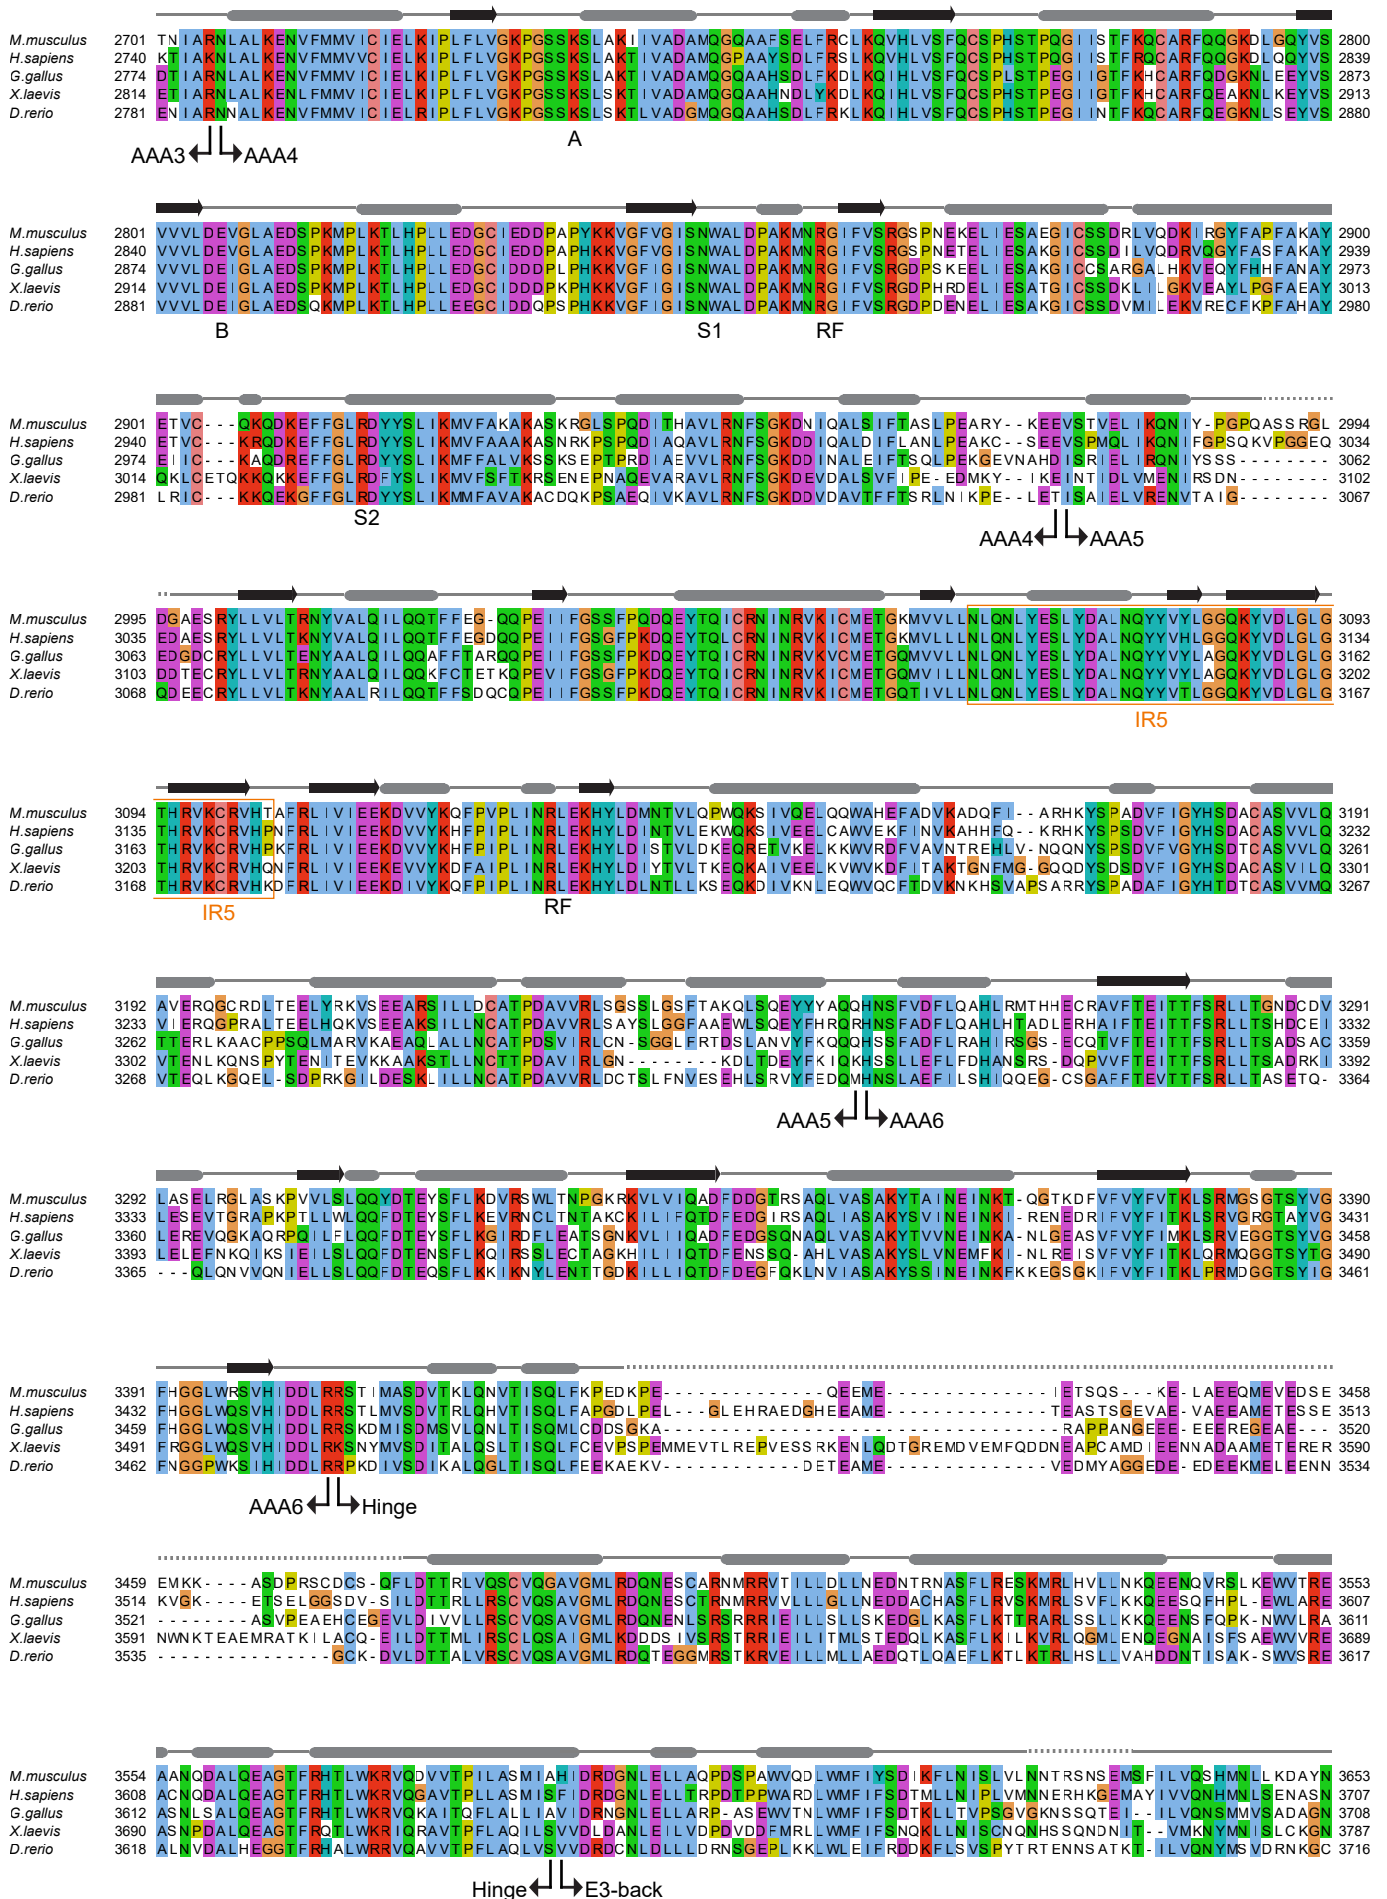

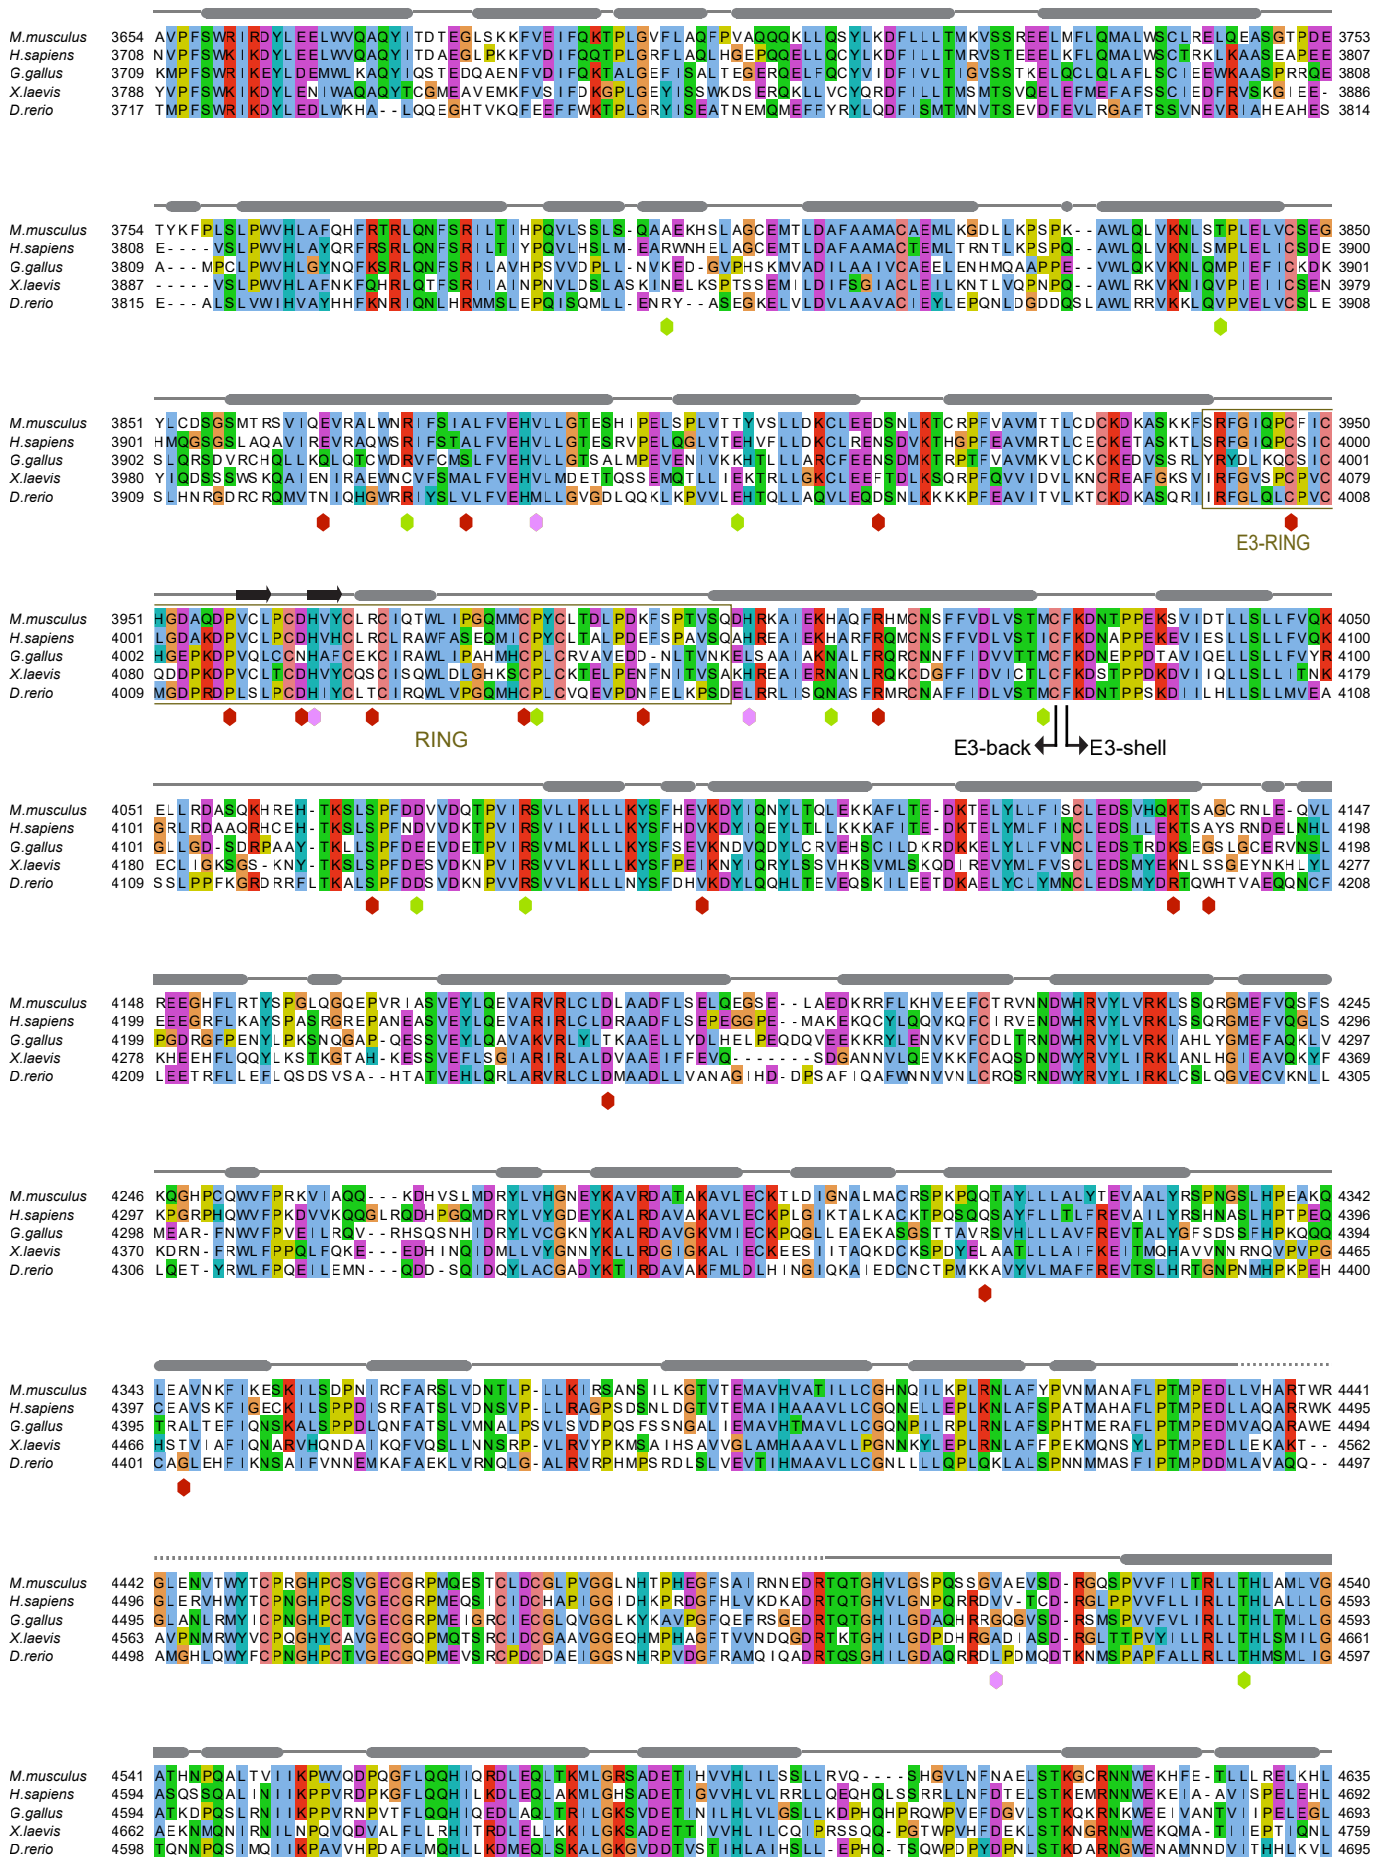

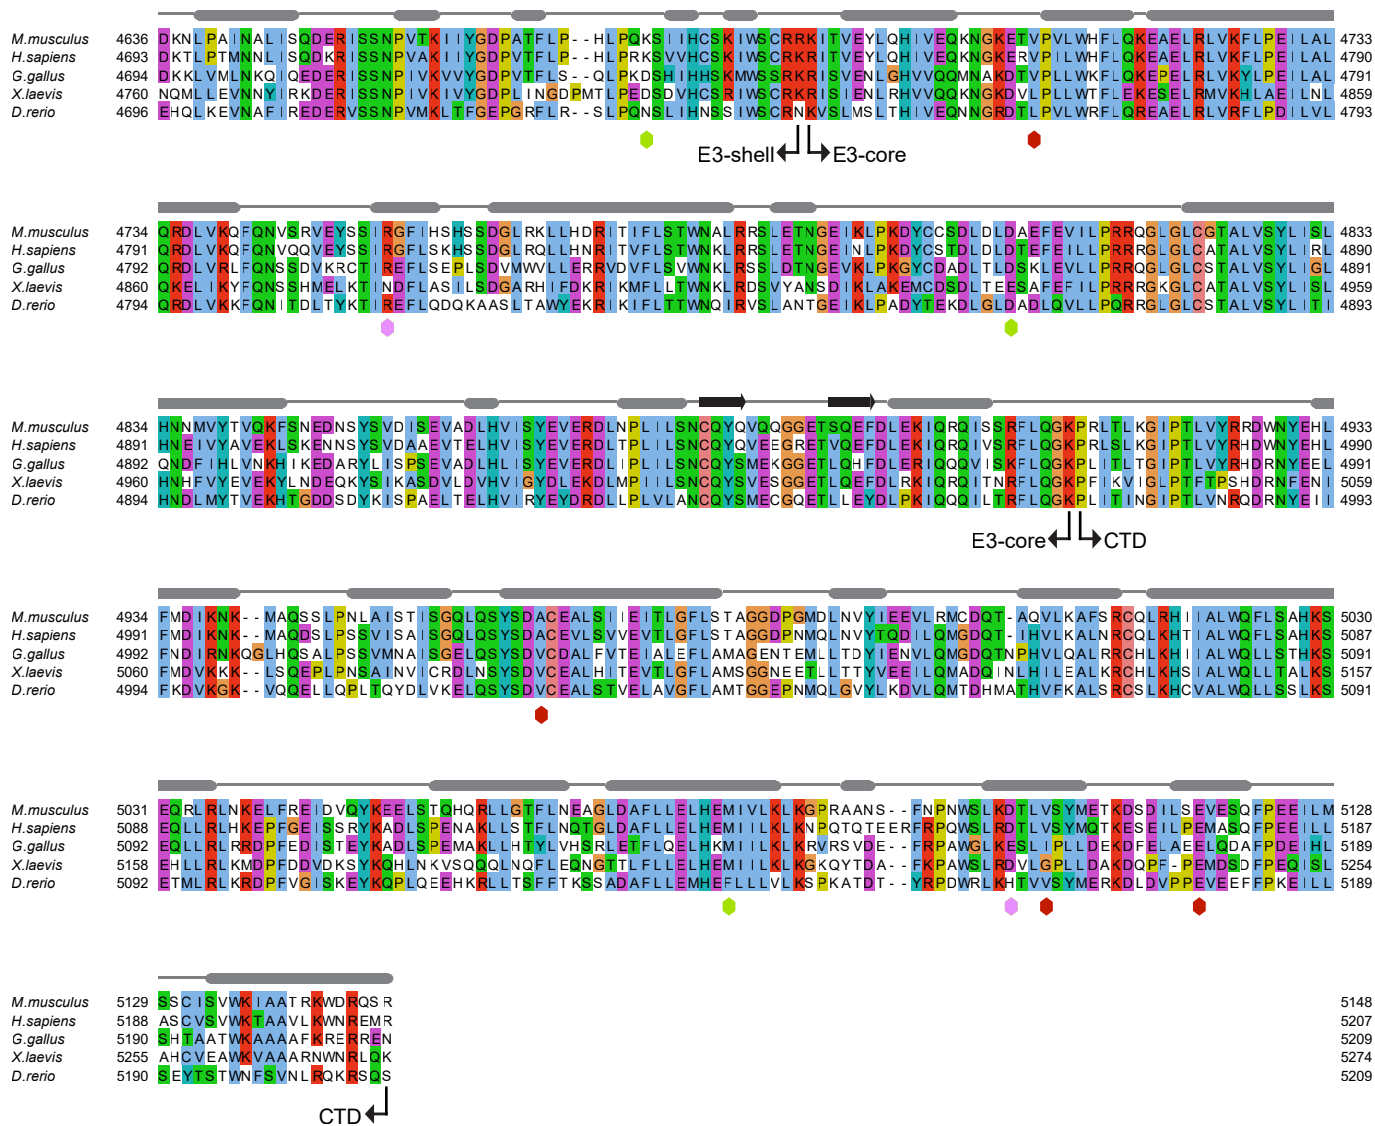

Supplement: elife-56185-supp1.pdf [file elife-56185-supp1.pdf]
