# Supplementary material for: Moyamoya disease factor RNF213 is a giant E3 ligase with a dynein-like core and a distinct ubiquitin-transfer mechanism
Source: eLife. 2020 Jun 23;9:e56185. doi: 10.7554/eLife.56185 (PMC7311170; doi:10.7554/eLife.56185)
Supplement: Supplementary file 4. [file elife-56185-supp4.xlsx]

## Sheet: Sheet1
Protein1	Protein2	fromSite	ToSite	Score	count PSMs	fdr	Protein1FDR	Protein2FDR	top pep fdr	top psm fdr
RNF213	RNF213	1	36	25.3184	4	0	0	0	0	0
RNF213	RNF213	1	50	18.3651	1	0	0	0	0	0
RNF213	RNF213	16	36	26.6643	2	0	0	0	0	0
RNF213	RNF213	46	51	29.1544	3	0	0	0	0	0
RNF213	RNF213	50	476	16.9122	4	0	0	0	0.00371747	0
RNF213	RNF213	196	202	27.3443	10	0	0	0	0	0
RNF213	RNF213	197	216	16.1661	4	0	0	0	0.00371747	0.00400802
RNF213	RNF213	197	1960	11.318	5	0.0342466	0	0	0.242634	0.144944
RNF213	RNF213	202	191	24.0127	3	0	0	0	0	0
RNF213	RNF213	213	222	24.5212	11	0	0	0	0.00371747	0
RNF213	RNF213	216	191	12.9679	2	0.0220588	0	0	0.00371747	0
RNF213	RNF213	216	227	33.424	10	0	0	0	0	0
RNF213	RNF213	220	202	25.746	8	0	0	0	0	0
RNF213	RNF213	234	216	17.7598	5	0	0	0	0.00371747	0.00888099
RNF213	RNF213	234	243	27.4763	6	0	0	0	0	0
RNF213	RNF213	256	243	13.0085	2	0.015873	0	0	0.0192308	0.00888099
RNF213	RNF213	259	267	14.6062	4	0	0	0	0.00371747	0
RNF213	RNF213	259	269	17.9206	14	0	0	0	0.01	0.0203046
RNF213	RNF213	271	267	29.0364	12	0	0	0	0	0
RNF213	RNF213	279	290	32.6961	22	0	0	0	0	0
RNF213	RNF213	279	323	13.9565	1	0.015873	0	0	0	0
RNF213	RNF213	290	297	23.1911	4	0	0	0	0	0
RNF213	RNF213	290	323	32.7136	8	0	0	0	0	0
RNF213	RNF213	297	279	29.6378	18	0	0	0	0	0
RNF213	RNF213	297	380	21.4486	1	0	0	0	0	0
RNF213	RNF213	297	429	20.3466	3	0	0	0	0	0
RNF213	RNF213	311	323	41.3487	10	0	0	0	0	0
RNF213	RNF213	311	380	17.6747	2	0	0	0	0	0
RNF213	RNF213	323	288	21.4029	3	0	0	0	0	0
RNF213	RNF213	323	297	40.2438	10	0	0	0	0	0
RNF213	RNF213	323	380	23.6161	2	0	0	0	0	0
RNF213	RNF213	323	414	23.7436	4	0	0	0	0	0
RNF213	RNF213	323	419	29.4329	4	0	0	0	0	0
RNF213	RNF213	323	429	26.9957	2	0	0	0	0	0
RNF213	RNF213	323	3913	16.2798	3	0	0	0	0	0
RNF213	RNF213	323	4059	12.2094	4	0.0220588	0	0	0.00699301	0.00888099
RNF213	RNF213	323	4109	23.4425	2	0	0	0	0	0
RNF213	RNF213	323	4210	30.5728	4	0	0	0	0	0
RNF213	RNF213	323	4258	20.0672	3	0	0	0	0	0
RNF213	RNF213	324	1725	11.9237	2	0.028169	0	0	0.00371747	0
RNF213	RNF213	324	2304	14.1175	10	0.00877193	0	0	0.01	0.0122592
RNF213	RNF213	368	323	16.7632	2	0	0	0	0	0
RNF213	RNF213	380	429	33.134	2	0	0	0	0	0
RNF213	RNF213	419	429	27.6413	6	0	0	0	0	0
RNF213	RNF213	444	323	21.3283	4	0	0	0	0	0
RNF213	RNF213	483	323	17.8503	2	0	0	0	0	0
RNF213	RNF213	483	429	14.9358	1	0	0	0	0	0
RNF213	RNF213	483	443	21.4252	5	0	0	0	0	0
RNF213	RNF213	483	444	23.9625	7	0	0	0	0	0
RNF213	RNF213	496	4659	12.2424	4	0.0220588	0	0	0.151064	0.0802632
RNF213	RNF213	547	323	22.0296	6	0	0	0	0	0
RNF213	RNF213	568	496	13.9293	1	0.015873	0	0	0	0
RNF213	RNF213	720	577	12.8315	2	0.0220588	0	0	0.00371747	0
RNF213	RNF213	852	923	28.3967	5	0	0	0	0	0
RNF213	RNF213	890	324	11.5282	4	0.0342466	0	0	0.0494505	0.0211039
RNF213	RNF213	890	3240	28.0139	4	0	0	0	0	0
RNF213	RNF213	890	3416	20.9309	2	0	0	0	0	0
RNF213	RNF213	1046	1697	18.9347	1	0	0	0	0	0
RNF213	RNF213	1185	1174	12.2462	3	0.0220588	0	0	0.01	0.00400802
RNF213	RNF213	1225	2869	27.2754	4	0	0	0	0	0
RNF213	RNF213	1276	1307	23.3417	5	0	0	0	0	0
RNF213	RNF213	1281	1307	42.569	7	0	0	0	0	0
RNF213	RNF213	1365	1307	48.4573	14	0	0	0	0	0
RNF213	RNF213	1367	1307	49.9232	14	0	0	0	0	0
RNF213	RNF213	1519	1589	16.6137	3	0	0	0	0	0
RNF213	RNF213	1562	1405	15.4041	2	0	0	0	0	0
RNF213	RNF213	1562	3319	41.8688	8	0	0	0	0	0
RNF213	RNF213	1562	3368	11.278	2	0.0402685	0	0	0.00371747	0.00400802
RNF213	RNF213	1566	3319	13.7681	1	0.015873	0	0	0	0
RNF213	RNF213	1568	3319	19.6883	3	0	0	0	0	0
RNF213	RNF213	1574	324	14.294	5	0	0	0	0.00371747	0.00217391
RNF213	RNF213	1697	1933	24.502	4	0	0	0	0	0
RNF213	RNF213	1777	1785	12.2748	2	0.0220588	0	0	0.0192308	0.00888099
RNF213	RNF213	1933	1974	35.7427	8	0	0	0	0	0
RNF213	RNF213	1969	1972	18.9353	4	0	0	0	0	0
RNF213	RNF213	1970	1933	27.8332	4	0	0	0	0	0
RNF213	RNF213	1970	1974	16.0687	3	0	0	0	0.00371747	0
RNF213	RNF213	1974	1979	13.5315	4	0.015873	0	0	0.0321637	0.0137457
RNF213	RNF213	1979	1972	13.5723	3	0.015873	0	0	0.00699301	0.00400802
RNF213	RNF213	1983	2006	31.1316	9	0	0	0	0	0
RNF213	RNF213	2066	2072	10.9691	3	0.0463576	0	0	0.172691	0.0955975
RNF213	RNF213	2070	2072	21.8174	6	0	0	0	0	0
RNF213	RNF213	2070	2073	13.3623	4	0.015873	0	0	0.0517711	0.0225443
RNF213	RNF213	2070	2074	15.6272	5	0	0	0	0.0131148	0.00591716
RNF213	RNF213	2070	2083	47.8273	10	0	0	0	0	0
RNF213	RNF213	2070	2097	30.7534	6	0	0	0	0	0
RNF213	RNF213	2074	2083	14.766	4	0	0	0	0.00371747	0
RNF213	RNF213	2074	2815	12.0535	2	0.028169	0	0	0.0238806	0.00888099
RNF213	RNF213	2225	1307	11.7153	2	0.028169	0	0	0.0131148	0.00591716
RNF213	RNF213	2227	2070	22.2951	4	0	0	0	0	0
RNF213	RNF213	2227	2097	26.6204	4	0	0	0	0	0
RNF213	RNF213	2230	2070	39.3511	6	0	0	0	0	0
RNF213	RNF213	2230	2083	14.0189	1	0.015873	0	0	0	0
RNF213	RNF213	2230	2097	47.4427	12	0	0	0	0	0
RNF213	RNF213	2230	2231	14.0106	4	0.015873	0	0	0.00699301	0.00217391
RNF213	RNF213	2231	2070	31.7256	7	0	0	0	0	0
RNF213	RNF213	2231	2097	12.8605	2	0.0220588	0	0	0.01	0.00400802
RNF213	RNF213	2234	2070	27.3507	6	0	0	0	0	0
RNF213	RNF213	2234	2097	22.6985	2	0	0	0	0	0
RNF213	RNF213	2383	2392	11.8057	5	0.028169	0	0	0.128261	0.0686406
RNF213	RNF213	2392	2411	57.1279	17	0	0	0	0	0
RNF213	RNF213	2411	2839	21.4741	4	0	0	0	0	0
RNF213	RNF213	2424	2408	32.8686	15	0	0	0	0	0
RNF213	RNF213	2490	2070	40.7641	13	0	0	0	0	0
RNF213	RNF213	2607	2761	11.9737	1	0.028169	0	0	0.00371747	0
RNF213	RNF213	2784	1519	18.1731	2	0	0	0	0	0
RNF213	RNF213	2838	2424	22.2216	5	0	0	0	0	0
RNF213	RNF213	2838	2784	45.7583	6	0	0	0	0	0
RNF213	RNF213	2869	1145	45.7422	5	0	0	0	0	0
RNF213	RNF213	2898	2869	26.3118	2	0	0	0	0	0
RNF213	RNF213	2927	2980	30.1488	8	0	0	0	0	0
RNF213	RNF213	2929	323	11.0951	4	0.0402685	0	0	0.0238806	0.00888099
RNF213	RNF213	2932	323	12.6689	5	0.0220588	0	0	0.0461095	0.0203046
RNF213	RNF213	2932	1969	12.4375	5	0.0220588	0	0	0.0494505	0.120283
RNF213	RNF213	2951	2906	35.9848	5	0	0	0	0	0
RNF213	RNF213	2951	2909	19.9383	3	0	0	0	0	0
RNF213	RNF213	2951	3118	26.6674	4	0	0	0	0	0
RNF213	RNF213	2970	1128	30.1548	4	0	0	0	0	0
RNF213	RNF213	3113	2951	22.5334	2	0	0	0	0	0
RNF213	RNF213	3266	4470	11.8414	12	0.028169	0	0	0.0461095	0.0802632
RNF213	RNF213	3302	3330	19.1169	2	0	0	0	0	0
RNF213	RNF213	3302	3462	17.7282	2	0	0	0	0.00371747	0
RNF213	RNF213	3415	3427	32.5506	7	0	0	0	0	0
RNF213	RNF213	3431	3423	22.8448	6	0	0	0	0	0
RNF213	RNF213	3441	3427	11.429	1	0.0342466	0	0	0.00371747	0
RNF213	RNF213	3462	3240	25.9241	4	0	0	0	0	0
RNF213	RNF213	3462	3416	16.4888	1	0	0	0	0	0
RNF213	RNF213	3462	3427	16.4459	3	0	0	0	0.00371747	0
RNF213	RNF213	3537	3427	43.0119	6	0	0	0	0	0
RNF213	RNF213	3547	3427	12.2892	1	0.0220588	0	0	0.00371747	0
RNF213	RNF213	4059	4110	15.3148	3	0	0	0	0	0.00217391
RNF213	RNF213	4090	4898	13.4285	1	0.015873	0	0	0	0
RNF213	RNF213	4156	1307	13.5595	5	0.015873	0	0	0.0494505	0.0211039
RNF213	RNF213	4258	4659	51.1815	22	0	0	0	0	0
RNF213	RNF213	4258	4675	25.2335	5	0	0	0	0	0
RNF213	RNF213	4264	4659	30.7347	7	0	0	0	0	0
RNF213	RNF213	4331	4246	39.6009	8	0	0	0	0	0
RNF213	RNF213	4331	4377	21.449	3	0	0	0	0	0
RNF213	RNF213	4335	4246	15.6626	3	0	0	0	0.00371747	0
RNF213	RNF213	4341	4295	42.6334	8	0	0	0	0	0
RNF213	RNF213	4348	4295	19.373	4	0	0	0	0.00371747	0
RNF213	RNF213	4354	4348	13.8233	3	0.015873	0	0	0.01	0.00400802
RNF213	RNF213	4458	4469	18.7157	4	0	0	0	0	0
RNF213	RNF213	4458	4470	18.5205	7	0	0	0	0	0
RNF213	RNF213	4613	3547	11.2581	3	0.0402685	0	0	0.0843672	0.0419162
RNF213	RNF213	4614	4793	19.161	2	0	0	0	0	0
RNF213	RNF213	4658	4662	18.7047	8	0	0	0	0.0321637	0.0137457
RNF213	RNF213	4689	4576	32.8295	4	0	0	0	0	0
RNF213	RNF213	4878	5038	10.9696	1	0.0463576	0	0	0.00371747	0
RNF213	RNF213	4911	4725	11.6916	2	0.0342466	0	0	0.0494505	0.0211039
RNF213	RNF213	4917	4882	15.2622	2	0	0	0	0	0
